# Supplementary material
Source: HighWire-hosted journal article supplement (https://bmjopen.bmj.com/content/7/12/e018954)
Supplement: inline-supplementary-material-1 [file inline-supplementary-material-1.pdf]

## Search Strategies

### Ovid MEDLINE(R) and Epub Ahead of Print, In-Process & Other Non-Indexed Citations, Ovid MEDLINE(R) Daily <1946 to Present> (Updated from June 2016-June 2017)

| #  | Searches                                                                      | Results |
|----|-------------------------------------------------------------------------------|---------|
| 1  | exp Pulmonary Disease, Chronic Obstructive/                                   | 47131   |
| 2  | Lung Diseases, Obstructive/                                                   | 18301   |
| 3  | exp Pulmonary Emphysema/                                                      | 15328   |
| 4  | (obstructive adj2 (pulmonary or lung\$ or respirat\$ or air\$)).tw,kf.        | 48677   |
| 5  | (chronic air\$ adj2 (obstruction\$ or limitation\$ or occlusion\$)).tw,kf.    | 1482    |
| 6  | (chronic bronch\$ adj2 (obstruction\$ or limitation\$ or occlusion\$)).tw,kf. | 100     |
| 7  | (chronic\$ adj2 bronch\$).tw,kf.                                              | 13305   |
| 8  | COPD.tw,kf.                                                                   | 37206   |
| 9  | COAD.tw,kf.                                                                   | 251     |
| 10 | emphysema\$.tw,kf.                                                            | 25309   |
| 11 | (acos and asthm*).tw,kf.                                                      | 161     |
| 12 | or/1-11                                                                       | 107273  |
| 13 | Nitric Oxide/                                                                 | 81932   |
| 14 | (feno and (fraction* or exhal* or nitric)).tw,kf.                             | 1310    |
| 15 | (fe no and (fraction* or exhal* or nitric)).tw,kf.                            | 413     |
| 16 | nitric oxid*.tw,kf.                                                           | 133212  |
| 17 | or/13-16                                                                      | 148646  |
| 18 | 12 and 17                                                                     | 818     |
| 19 | (2016-06* or 2016-07* or 2016-08* or 2016-09* or 2016-1* or 2017*).ez,dt.     | 1334389 |
| 20 | 18 and 19                                                                     | 53      |
